# Supplementary material for: The SARS-CoV-2 Exerts a Distinctive Strategy for Interacting with the ACE2 Human Receptor
Source: MDPI journal article supplement (doi:10.3390/v12050497), 2020-04-30
Supplement: s1 [file s1]

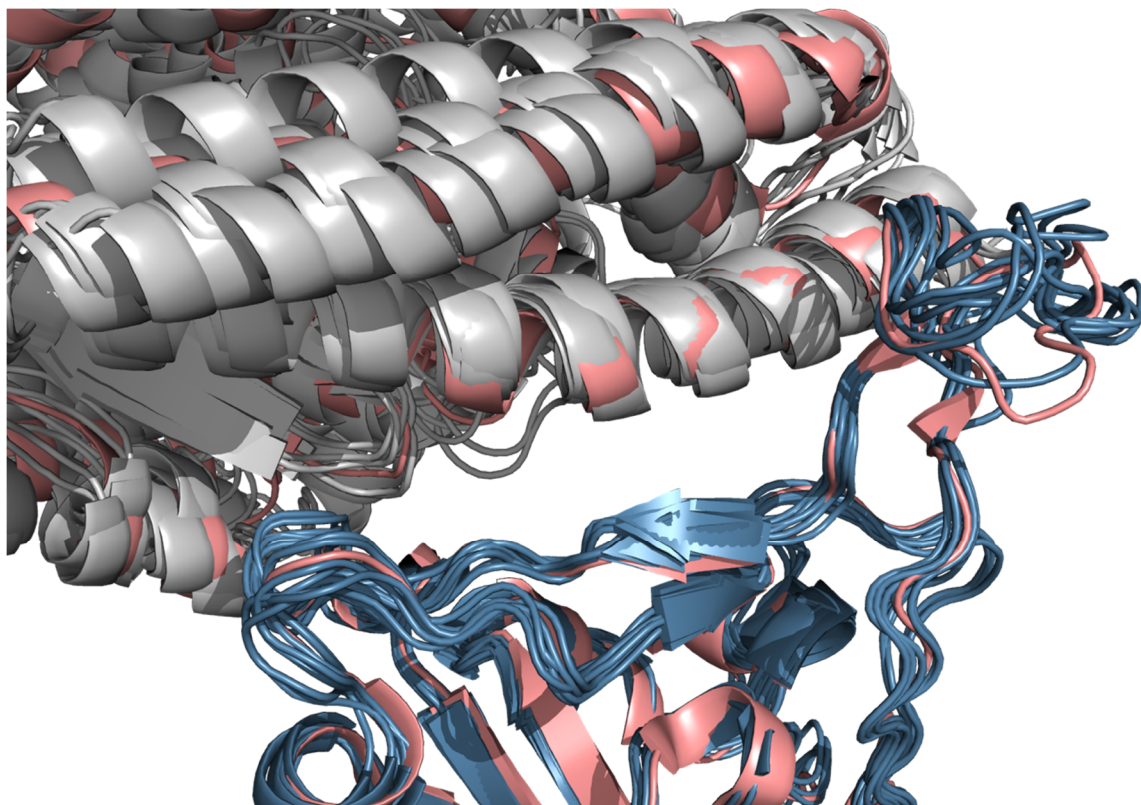

**Figure S1.** A comparison between the X-ray structure of the COVID-19-ACE2 complex (PDB 6VW1, pink) and the molecular dynamics (MD) trajectory frames. The MD snapshots are colored gray and blue for ACE2 and COVID-19 RBD, respectively. The average RMSD over the interface C $\alpha$  atoms is ~1Å.

|           |     |         |        |        |         |         |         |            |                            |
|-----------|-----|---------|--------|--------|---------|---------|---------|------------|----------------------------|
| HCoV-NL63 | 481 | QHTDINF | TATAS  | FGGSCY | VCKPHQ  | VNISL   | NG----- | NTSVC----- | VRT                        |
| MERS      | 381 | VECDF   | SPLLS  | SGTP-  | PQVYN   | FKRLV   | TNCN    | YNLT       | KLKLSLFSVNDFTC-----        |
| COVID-19  | 334 | --CPFGE | VFNAT  | RFASV  | YAWNR   | KRISN   | CVADY   | SVLYNS     | ASFSTFKCYGVSPTKLNDLCFT     |
| SARS-2002 | 321 | --CPFGE | VFNAT  | KFPSV  | YAWER   | KKISN   | CVADY   | SVLYNST    | FFSTFKCYGVSATKLNDLCFS      |
| SARS-des  | 321 | --CPFGE | VFNAT  | KFPSV  | YAWER   | KKISN   | CVADY   | SVLYNST    | FFSTFKCYGVSATKLNDLCFS      |
|           |     | :       | .      | :      | .       | *       | :       | .          | .                          |
|           |     | :       | .      | :      | .       | *       | :       | .          | .                          |
| HCoV-NL63 | 520 | SHFSIRY | IY---- | NRVKS  | SGSPG-- | DSSWH   | IYLK    | SGTC-----  | PFSFSK                     |
| MERS      | 440 | SLILDY  | FSYPL  | SMKSD  | LSVSS   | AGPIS   | QFNY    | KQSF       | SNPTCLILATVPHNLTITIKPLKYSY |
| COVID-19  | 388 | NVYADS  | SVIRG  | DEVQR  | IAPGQ   | TGKI    | ADYNY   | KLPDD      | FTGCVIAWNSNNLDSKVGGN       |
| SARS-2002 | 375 | NVYADS  | SVVVK  | GDDVR  | QIAPG   | QTGV    | IADYNY  | KLPDD      | FMGCVLAWNTNIDATSTGN        |
| SARS-des  | 375 | NVYADS  | SVVVK  | GDDVR  | QIAPG   | QTGV    | IADYNY  | KLPDD      | FMGCVLAWNTNIDATSTGN        |
|           |     | .       | :      | :      | .       | .       | .       | .          | .                          |
|           |     | .       | :      | :      | .       | .       | .       | .          | .                          |
| HCoV-NL63 | 553 | ----    | LNNFQ  | KF---- | KTICF   | STVE--  | -----   | VPGSCN     | FPLEATWHYTSYTIVGALYV       |
| MERS      | 500 | ----    | INKSR  | FLSDD  | TEVPQ   | LVNAN   | QYSP    | CVSIV      | PSTV-WEDGDYYKQLSPLEGGGWL   |
| COVID-19  | 454 | RLFRK   | SNLKP  | PFERD  | ISTEY   | QAGS--- | TPCNG   | VEGF       | NCYFPLOS--YGFQPTNGVGYQ     |
| SARS-2002 | 441 | RYLRH   | GKLRP  | PFERD  | ISNV    | PFSPD   | G----   | KPCTP-     | PALNCYWPLND--YGFYTTTGIGYQ  |
| SARS-des  | 441 | RFLRH   | GKLRP  | PFERD  | ISNV    | PFSPD   | G----   | KPCTP-     | PAFNCYWPLND--YGFYTTTGIGYQ  |
|           |     | .       | :      | *      | .       | .       | .       | .          | .                          |
|           |     | .       | :      | *      | .       | .       | .       | .          | .                          |
| HCoV-NL63 | 599 | TWSE    | -----  | -----  | -----   | -----   | -----   | -----      | -----                      |
| MERS      | 555 | VASGST  | VAMTE  | QLQM   | GFGIT   | VQYG    | -----   | -----      | -----                      |
| COVID-19  | 507 | PYRV    | -----  | -----  | -----   | -----   | -----   | -----      | -----                      |
| SARS-2002 | 493 | PYRV    | -----  | -----  | -----   | -----   | -----   | -----      | -----                      |
| SARS-des  | 493 | PYRV    | -----  | -----  | -----   | -----   | -----   | -----      | -----                      |

**Figure S2.** The multiple sequence alignment of the analyzed receptor-binding domains (RBDs).

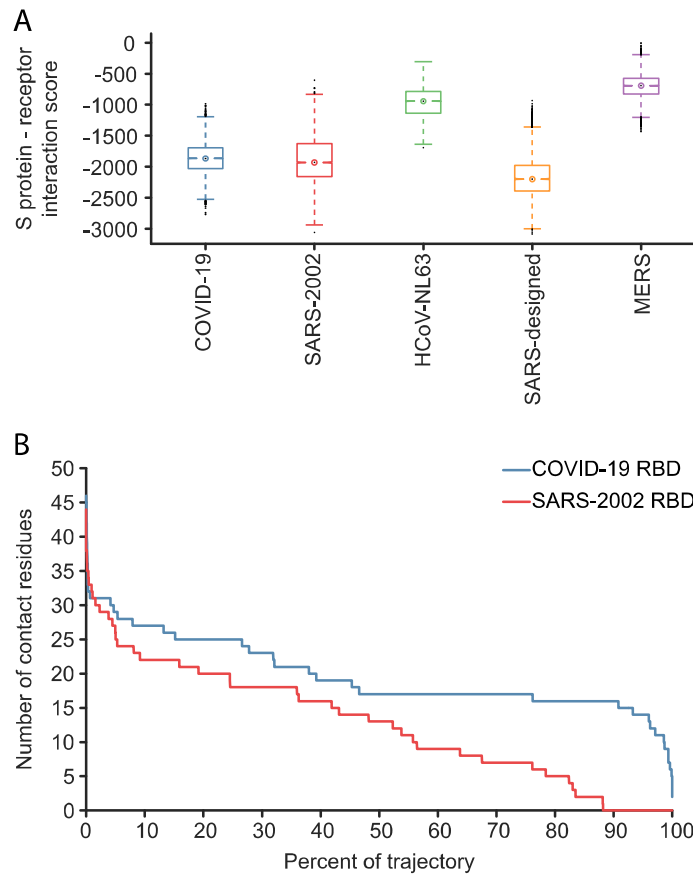

**Figure S3.** (A) Box plots of the statistically optimized atomic potentials (SOAP) interaction scores for the trajectory's frames. The center point is the median score, while 50% of the scores are within the box. The whiskers extend to cover > 99% of the scores. (B) The numbers of RBD residues in contact with ACE2 vs. the fraction of trajectory frames for COVID-19 (blue) and SARS-2002 (red).

| COVID-19 | Residue number | SARS-2002 | Residue number |
|----------|----------------|-----------|----------------|
| ARG      | 403            | LYS       | 390            |
| LYS      | 417            | VAL       | 404            |
| VAL      | 445            | SER       | 432            |
| GLY      | 446            | THR       | 433            |
| LEU      | 455            | TYR       | 442            |
| PHE      | 456            | LEU       | 443            |
| TYR      | 473            | PHE       | 460            |
| GLN      | 474            | SER       | 461            |
| ALA      | 475            | PRO       | 462            |
| GLY      | 476            | ASP       | 463            |
| SER      | 477            | GLY       | 464            |
| THR      | 478            | LYS       | 465            |
| ASN      | 481            | THR       | 468            |
| GLY      | 482            | PRO       | 469            |
| GLU      | 484            | PRO       | 470            |
| GLY      | 485            | ALA       | 471            |
| PHE      | 486            | LEU       | 472            |
| PHE      | 490            | TRP       | 476            |
| GLN      | 493            | ASN       | 479            |
| SER      | 494            | ASP       | 480            |
| GLN      | 498            | TYR       | 484            |
| PRO      | 499            | THR       | 485            |
| ASN      | 501            | THR       | 487            |
| VAL      | 503            | ILE       | 489            |

**Table S1.** The receptor-binding domain (RBD) interface residues that have substitutions between COVID-19 and SARS-2002.

|                    | PRODIGY<br>$\Delta G$ (kcal mol <sup>-1</sup> )<br><sup>1)</sup> | PRODIGY<br>Kd 10 <sup>-9</sup> (M) | FoldX<br>(kcal/mol <sup>-1</sup> ) | SOAP<br>score |
|--------------------|------------------------------------------------------------------|------------------------------------|------------------------------------|---------------|
| COVID-19—ACE2      | -11.7                                                            | 2.60                               | -1.93                              | -1865.9       |
| SARS-2002—<br>ACE2 | -12.1                                                            | 1.30                               | -2.67                              | -1929.5       |

**Table S2.** RBD–ACE2 interface evaluated by several methods for analysis of protein–protein interactions.

**Movie S1.** The overlay of 50 random snapshots from the MD trajectories of COVID-19–ACE2, SARS-2002–ACE2, and HCoV-NL63–ACE2 complexes. For clarity, only one copy of the ACE2 is shown (gray), and COVID-19, SARS-2002, and HCoV-NL63 are colored blue, red, and green, respectively.
